# Supplementary material for: Date-Palm-Derived Cellulose Nanocrystals as Reinforcing Agents for Poly(vinyl alcohol)/Guar-Gum-Based Phase-Separated Composite Films
Source: MDPI journal article supplement (doi:10.3390/nano12071104), 2022-03-27
Supplement: s1 [file s1]

## Supplementary Information

**Figure. S1.** The prepared phase-separated films placed over scales to analyze morphology and transparency

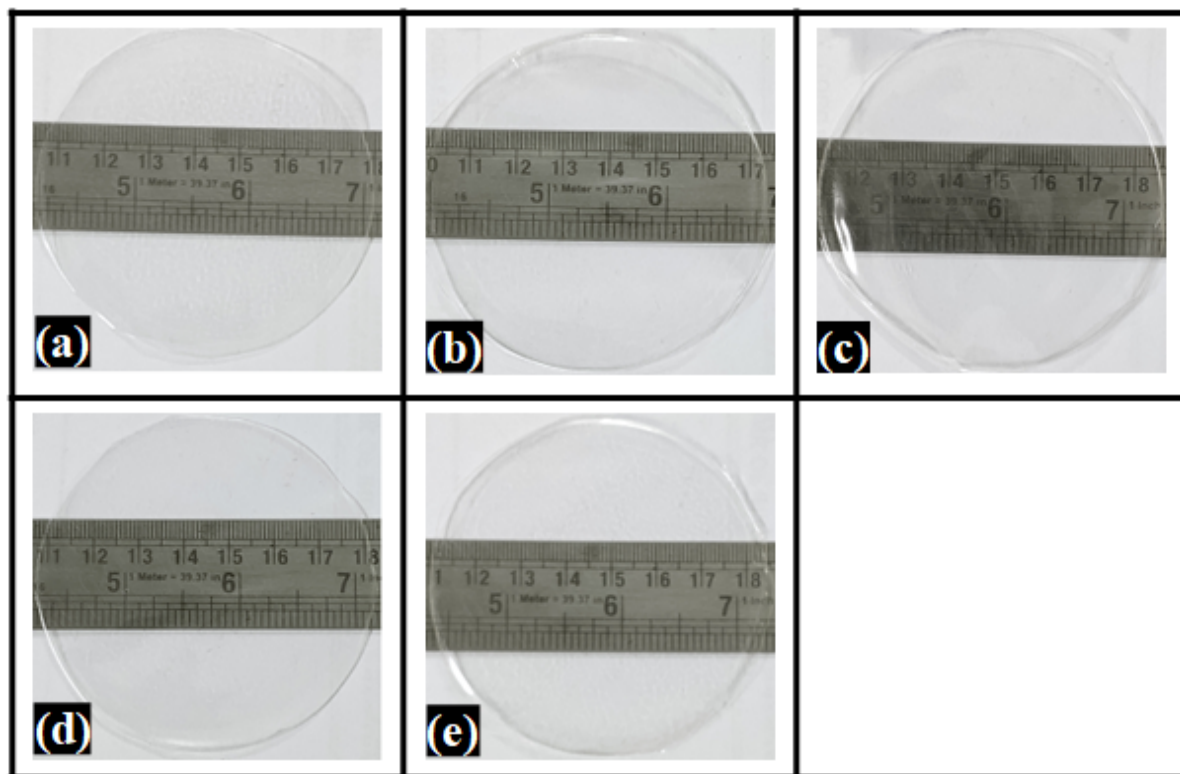

Figure.S1. Phase separated films (a) A0, (b) A1, (c) A2, (d) A3, and (e) A4.
